# Supplementary material for: Type I interferon shapes brain distribution and tropism of tick-borne flavivirus
Source: Springer Nature journal article supplement (doi:10.1038/s41467-023-37698-0), 2023-04-10
Supplement: 41467_2023_37698_MOESM1_ESM.pdf [file 41467_2023_37698_MOESM1_ESM.pdf]

1 **Supplementary information**

2 **Type I interferon shapes brain distribution and tropism of tick-borne flavivirus**

3  
4 Nunya Chotiwan<sup>1,2,3\*,#</sup>, Ebba Rosendal<sup>1,2,#</sup>, Stefanie M. A. Willekens<sup>1,2,4,#</sup>, Erin  
5 Schexnaydre<sup>1,2,5,6,7</sup>, Emma Nilsson<sup>1,2</sup>, Richard Lindqvist<sup>1,2</sup>, Max Hahn<sup>4</sup>, Ionut Sebastian  
6 Mihai<sup>2,8,9</sup>, Federico Morini<sup>4</sup>, Jianguo Zhang<sup>1,2,5,6,7</sup>, Gregory D. Ebel<sup>10</sup>, Lars-Anders  
7 Carlson<sup>2,5,6,7</sup>, Johan Henriksson<sup>2,7,8</sup>, Ulf Ahlgren<sup>4</sup>, Daniel Marcellino<sup>11</sup>, Anna K. Överby<sup>1,2\*</sup>

8  
9 <sup>1</sup> Department of Clinical Microbiology, Umeå University; 90185 Umeå, Sweden

10 <sup>2</sup> The Laboratory for Molecular Infection Medicine Sweden (MIMS), Umeå University; 90187 Umeå, Sweden

11 <sup>3</sup> Chakri Naruebodindra Medical Institute, Faculty of Medicine Ramathibodi Hospital, Mahidol University,  
12 Samut Prakan, 10540, Thailand

13 <sup>4</sup> Umeå Centre for Molecular Medicine (UCMM), Umeå University; 90187 Umeå, Sweden

14 <sup>5</sup> Wallenberg Centre for Molecular Medicine, Umeå University; 90187 Umeå, Sweden

15 <sup>6</sup> Department of Medical Biochemistry and Biophysics, Umeå University; 90187 Umeå, Sweden

16 <sup>7</sup> Umeå Centre for Microbial Research, Umeå University; 90187 Umeå, Sweden

17 <sup>8</sup> Department of Department of Molecular biology, Umeå University; 90187 Umeå, Sweden

18 <sup>9</sup> Företagsforskarskolan, Umeå University, 90187 Umeå, Sweden

19 <sup>10</sup> Department of Microbiology, Immunology and Pathology, Colorado State University, USA

20 <sup>11</sup> Department of Integrative Medical Biology, Umeå University; 90187 Umeå, Sweden

21

22  
23 \*Corresponding authors: Anna K Överby and Nunya Chotiwan  
24 # Contributed equally

25  
26 **Email:** anna.overby@umu.se and nunya.chotiwan@umu.se

27

28

29

30

31

32

33

34 **This PDF file includes:**

35       Supplementary figures 1-5

36       Supplementary Table 1

37

38 **Other supplementary materials for this manuscript include the following:**

39       Supplementary Movie 1-3

40       Supplementary Data 1-2

41       Source Data file

42

43 **Supplementary figures**

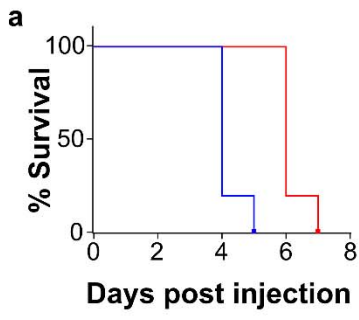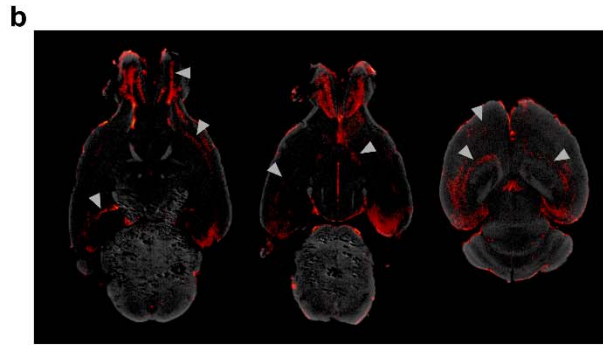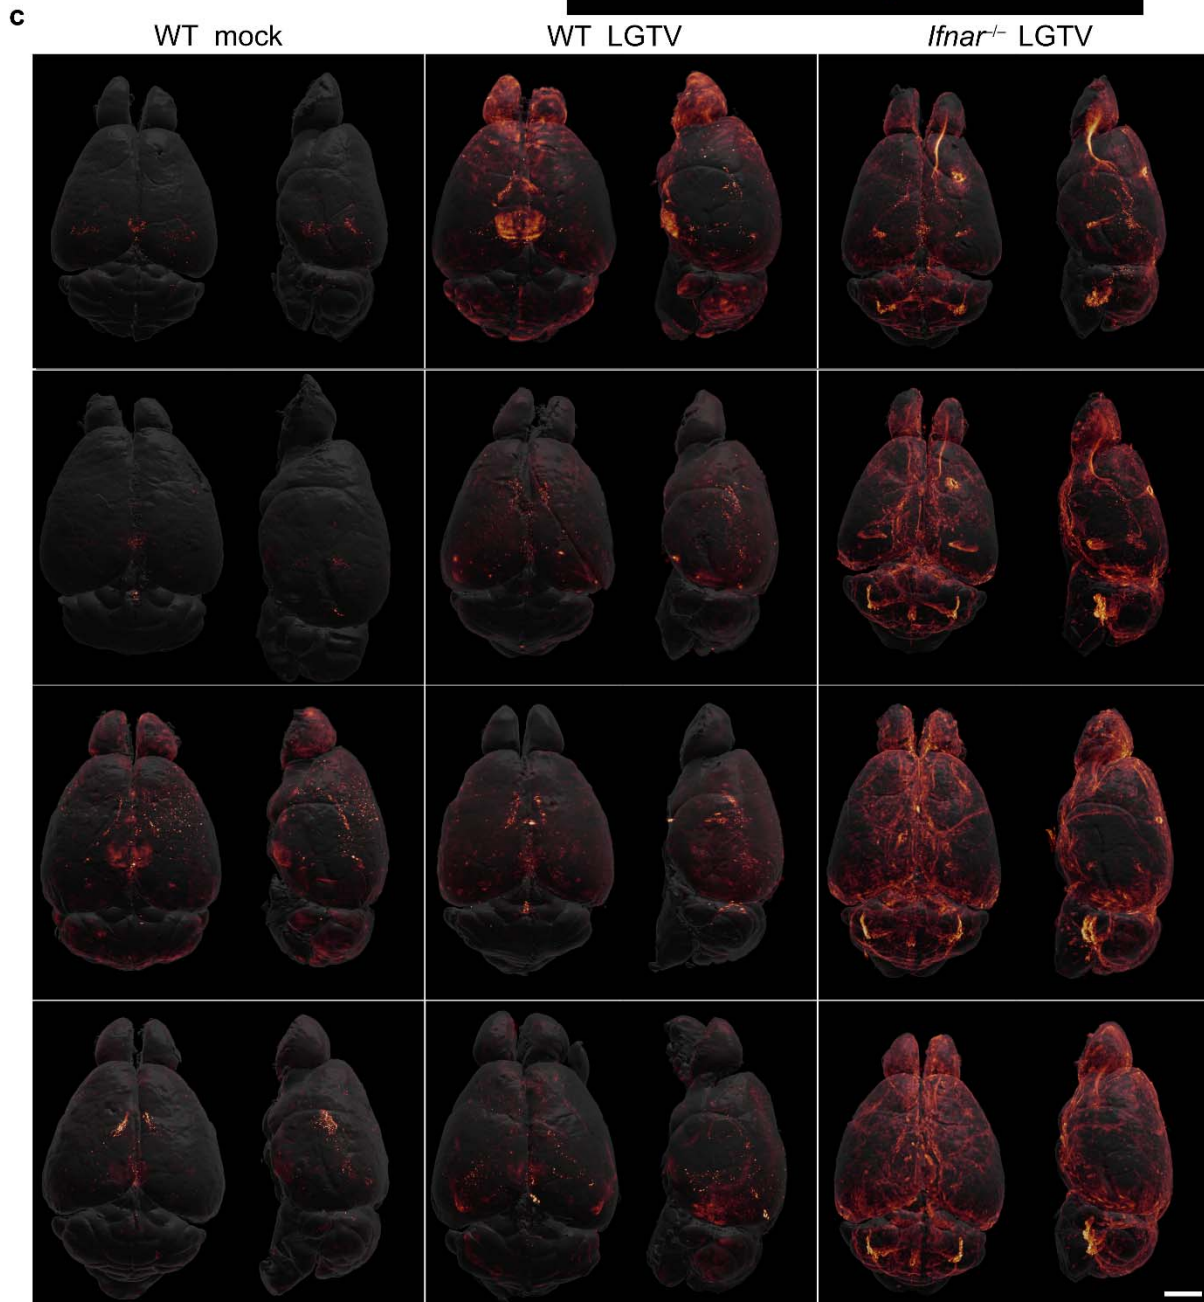

45 **Supplementary Fig. 1. IFN-I response influences host survival and distribution of LGTV infection. a**

46 Survival analysis of WT and *Ifnar*<sup>-/-</sup> mice, intracranially injected with 1000 pfu of LGTV (n = 5). Survival

47 differences between groups were significant (log-rank test, p = 0.0031). **b** OPT cross sections of a

48 representative *Ifnar*<sup>-/-</sup> brain showing antibody penetration in the deeper areas of the brain (arrows). **c** OPT-

49 scanned immunolabeled brain reveals the distribution of LGTV infection in the adult mouse brain.

50 Volumetric 3D render of supplementary OPT scans of the brain from mock and LGTV infected mice

51 immunolabeled with antibodies against viral NS5. The signal intensity was normalized within an individual

52 brain and adjusted to identical minimum and maximum. The viral signal was overlaid onto the anatomical

53 outlines created from iso-surface rendering of the autofluorescence signal of each brain. For each image

54 pair, the top and lateral views of the same specimen are shown. Scale bar = 2000 μm. Source data are

55 provided as a Source Data file.

56

57

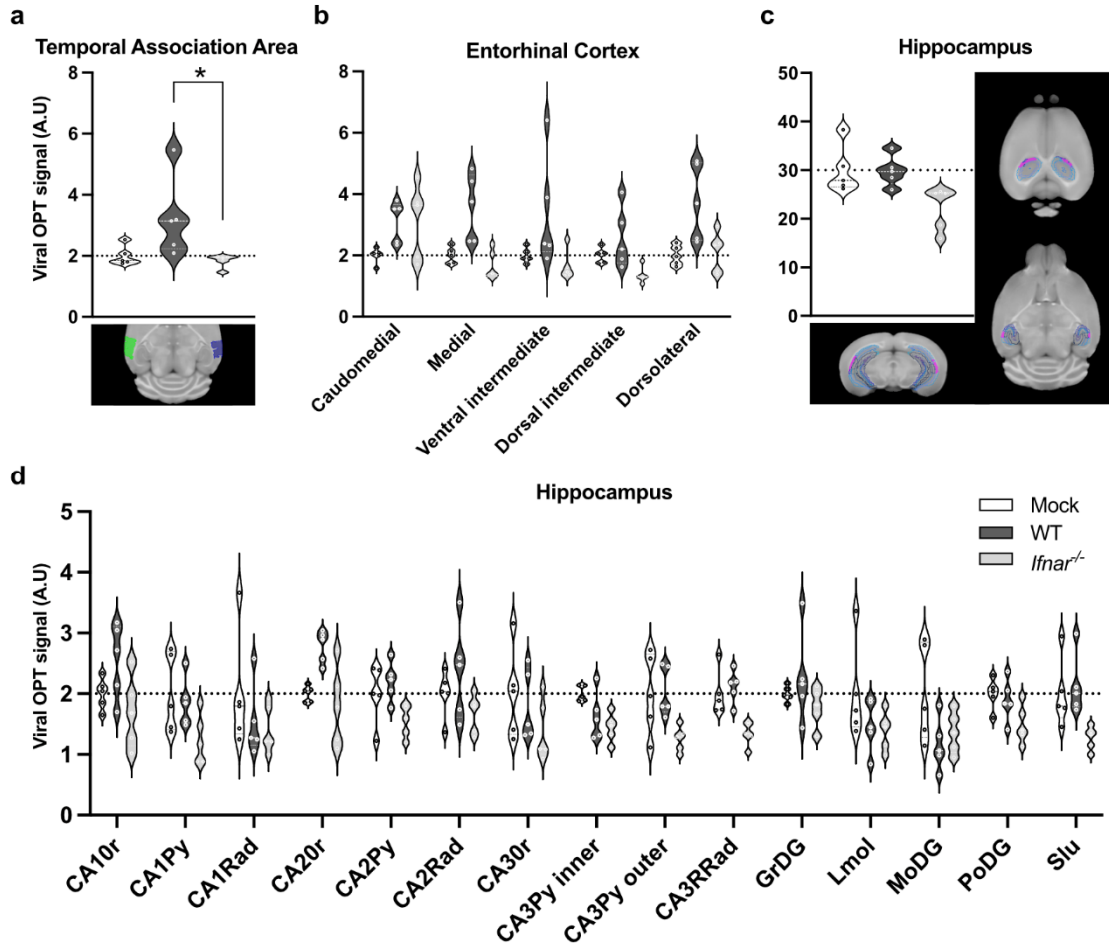

58

59

60 **Supplementary Fig. 2. Image and quantification of viral infection in cerebral cortex regions.**

61 Quantification and statistical analysis (two-tailed unpaired t-test (a and c) with Holm-Sidak multiple

62 comparison correction (c and d) of viral OPT signal in **a** temporal association area (\*p=0.047), **b** individual

63 VOIs in the composite entorhinal cortical region, **c** composite hippocampal region, and **d** individual VOIs in

64 the hippocampal region. Source data are provided as a Source Data file.

65

66

67

68

a

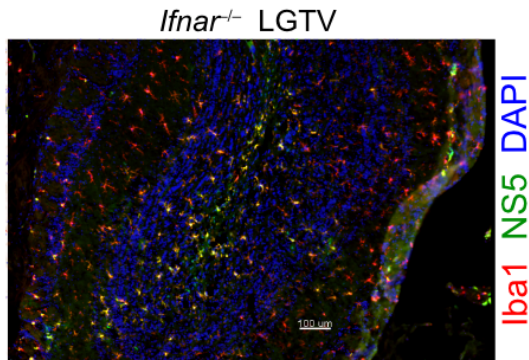

b

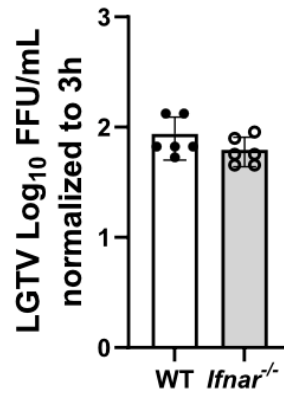

69

70 **Supplementary fig. 3 Microglia staining of OB and primary microglia infected with LGTV *in vitro*.**

71 a) Maximum-intensity projection of confocal z-stack. The images were taken from sagittal brain sections

72 (10 μm) using confocal microscope, representative picture of OB is shown. Scale bars = 100 μm. The

73 sections were immunolabeled using anti-NS5 (green), anti-Iba1 (red) for microglia, and DAPI for nucleus

74 (blue). b) Primary microglia were isolated from WT and *Ifnar*<sup>-/-</sup> brains. The cells were infected with LGTV

75 (MOI 1) for 72 h and viral growth was measured by focus forming assay, bars show mean ± SD (n = 6).

76 Source data are provided as a Source Data file.

77

78

79

80

81

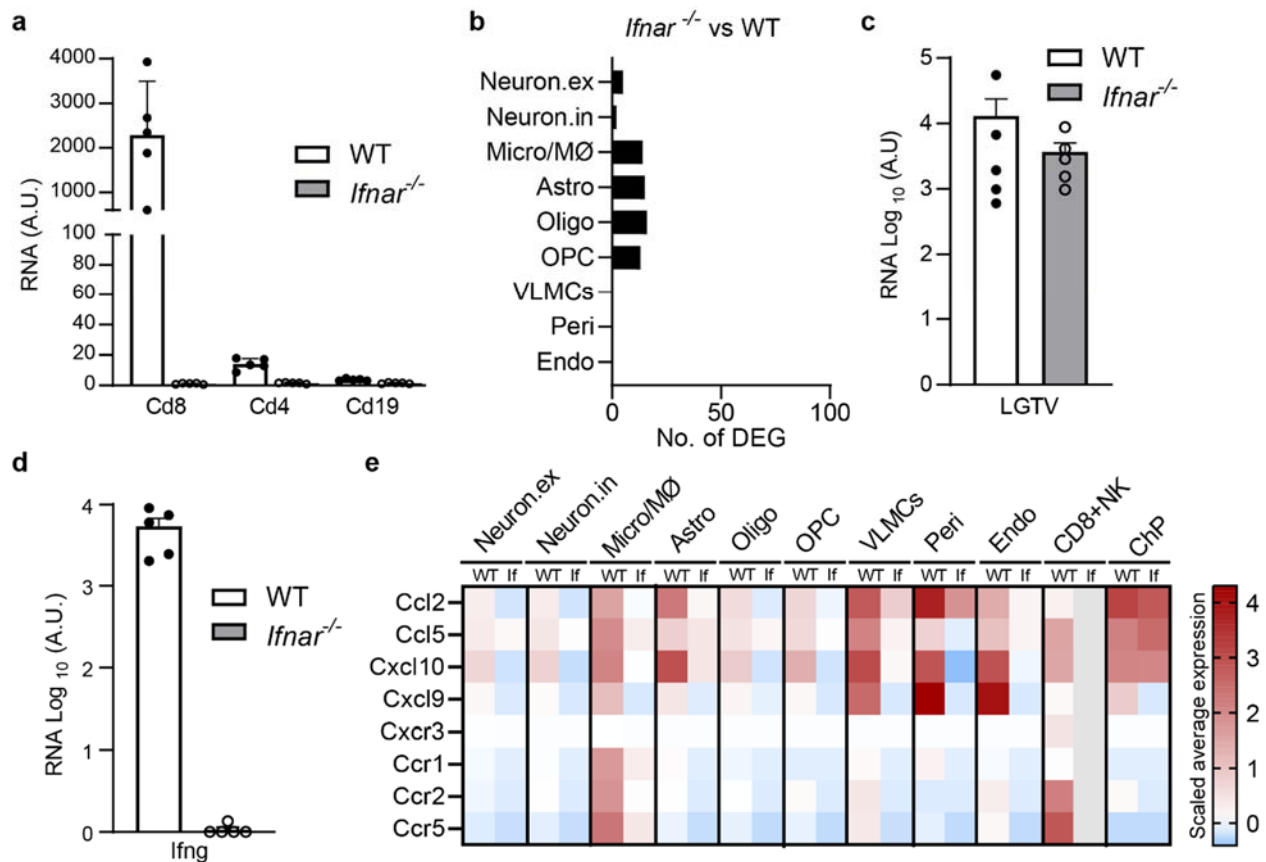

82  
83  
84  
85  
86  
87  
88  
89  
90  
91  
92  
93  
94  
95  
96

**Supplementary Fig. 4. Transcriptional differences and viral load in WT and *Ifnar*<sup>-/-</sup> mice.** **a** Gene expression of *Cd8*, *Cd4* and *Cd19* in cortex of infected WT (n=5) and *Ifnar*<sup>-/-</sup> (n=5) mice. Quantified by qPCR and normalized to housekeeping gene *Gapdh*, bars show mean ±SD. **b** Number of DEGs (log<sub>2</sub>FC>1, padj < 0.05) between *Ifnar*<sup>-/-</sup> and WT mice in uninfected samples. **c** Viral load in cerebral cortex at the humane endpoint in WT (n=5) and *Ifnar*<sup>-/-</sup> mice (n=5) infected with 10,000 PFU intracranially. Quantified by qPCR and normalized to housekeeping gene *Gapdh*. Bars represent mean ±SEM. **d** Gene expression of *Cd8*, *Cd4* and *Cd19* in cortex of infected WT (n=5) and *Ifnar*<sup>-/-</sup> (n=5) mice, bars show mean ±SEM. Quantified by qPCR and normalized to housekeeping gene *Gapdh*. **e** Heatmap showing expression of T cell chemoattractants and corresponding receptors upon infection in WT and *Ifnar*<sup>-/-</sup> (If) mice. Source data are provided as a Source Data file.

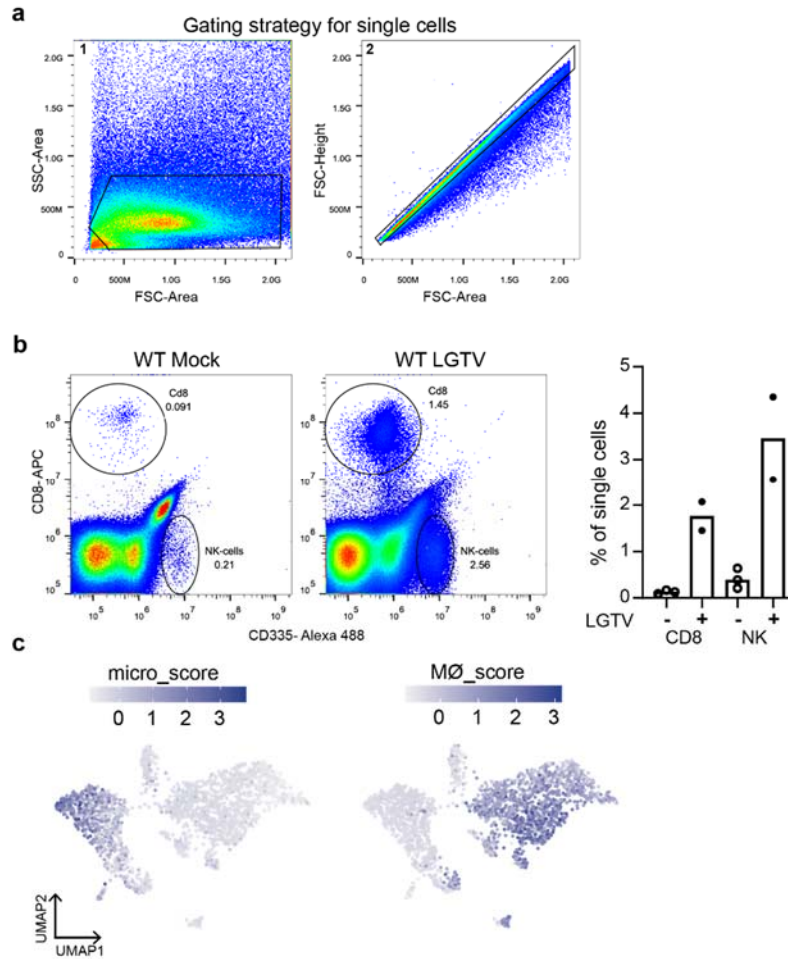

97

98 **Supplementary Fig. 5. Infiltration of immune cells in WT and *Ifnar*<sup>-/-</sup> mice.** **a** Representative  
 99 scatterplots showing gating strategy based on forward scatter (FSC) and side scatter (SSC) for obtaining  
 100 single cells used in downstream analysis of brain leucocytes. **b** Flow cytometry of brain leukocytes from the  
 101 cerebral cortex of untreated and infected WT mice. Representative scatterplots and percentage CD8+ T  
 102 cells and NK cells (CD335<sup>+</sup>). Boxes represent means of untreated (n=3) and LGTV infected (n=2). **c**  
 103 Subclustering of 2,363 nuclei of micro/MØ cell subset belonging to all datasets, colored by gene signatures  
 104 for microglia (*Cx3cr1*, *P2ry12*, *Slco2b1*, *Tmem119*) or MØ (*Sfn4*, *Ms4a8a*, *Clec4e*, *Itga4*) (PMID:  
 105 31325960). Source data are provided as a Source Data file.

106

107

108

109



110 **Supplementary Table 1. Key Antibody Table**

| <b>Antibodies</b>                                 | <b>Origin</b> | <b>Clonality</b> | <b>Clone name</b>  | <b>Working dilution</b> | <b>Use in the current study</b> | <b>Company (Cat#)</b>                 |
|---------------------------------------------------|---------------|------------------|--------------------|-------------------------|---------------------------------|---------------------------------------|
| <b>Anti-chicken Alexa Fluor 488</b>               | Goat          | Polyclonal       | -                  | 1:400                   | IHC                             | Thermo Fisher Scientific (A11039)     |
| <b>Anti-chicken Alexa Fluor 555</b>               | Goat          | Polyclonal       | -                  | 1:500                   | IHC                             | Thermo Fisher Scientific (A21437)     |
| <b>Anti-chicken Alexa Fluor 680</b>               | Goat          | Polyclonal       | -                  | 1:500                   | OPT, IHC                        | Abcam (ab175779)                      |
| <b>Anti-mouse Alexa Fluor 647</b>                 | Goat          | Polyclonal       | -                  | 1:500                   | IHC                             | Abcam (ab150115)                      |
| <b>Anti-rabbit Alexa Fluor 488</b>                | Donkey        | Polyclonal       | -                  | 1:500                   | IHC                             | Thermo Fisher Scientific (A21206)     |
| <b>Anti-rabbit Alexa Fluor 594 (pre-absorbed)</b> | Donkey        | Polyclonal       | -                  | 1:500                   | OPT                             | Abcam (ab150064)                      |
| <b>Anti-mouse CD45 Alexa 488</b>                  | Rat           | Monoclonal       | 30F-11             | 1:100                   | IHC                             | Thermo Fisher Scientific (53-0451-82) |
| <b>AQPI</b>                                       | Mouse         | Monoclonal       | sc-32737           | 1:50                    | IHC                             | Santa Cruz Biotechnology (sc-32737)   |
| <b>CD8</b>                                        | Rat           | Monoclonal       | Clone 53-6.7 (RUO) | 1:200                   | IHC                             | BD Pharmigen (561093)                 |
| <b>CD335</b>                                      | Rat           | Monoclonal       | 29A1.4             | 1:500                   | IHC                             | Thermo Fisher Scientific (AB_1724164) |
| <b>Doublecortin</b>                               | Rabbit        | Polyclonal       | -                  | 1:800                   | IHC                             | Cell Signaling (4604)                 |
| <b>Iba1</b>                                       | Rabbit        | Polyclonal       | -                  | 1:400                   | IHC                             | Histolab (CP290)                      |
| <b>NS5*</b>                                       | Chicken       | Polyclonal       | -                  | 1:1000                  | OPT, IHC                        | Agrisera AB                           |
| <b>TMEM119</b>                                    | Rabbit        | Monoclonal       | 28-3               | 0.5µg/ml                | IHC                             | Abcam (ab209064)                      |
| <b>TUBB3</b>                                      | Rabbit        | Polyclonal       | -                  | 1:3000                  | IHC                             | BioLegend (PRB-435P)                  |

111 \*Affinity-purified NS5 antibody was produced in chicken, according to the manufacturer's protocol, using the following peptide sequence of NS5 from

112 tick-borne encephalitis virus strain Torö (GenBank: DQ401140): (carboxylated)-CMDRHDLHWELRLESS-(amidated).
